# Supplementary material
Source: publisher figshare collection journal article supplement (https://acs.figshare.com/ndownloader/files/5338888)
Supplement: Supplementary file 1 [file 5338888]

 
data_7a
 
_audit_creation_method            SHELXL-97
_chemical_name_systematic
;
 ?
;
_chemical_name_common             ?
_chemical_melting_point           ?
_chemical_formula_moiety           
'C22 H28 O Si'
_chemical_formula_sum
 'C22 H28 O Si'
_chemical_formula_weight          336.55
 
loop_
 _atom_type_symbol
 _atom_type_description
 _atom_type_scat_dispersion_real
 _atom_type_scat_dispersion_imag
 _atom_type_scat_source
 'C'  'C'   0.0180   0.0090
 'International Tables Vol C Tables 4.2.6.8 and 6.1.1.4'
 'H'  'H'   0.0000   0.0000
 'International Tables Vol C Tables 4.2.6.8 and 6.1.1.4'
 'O'  'O'   0.0490   0.0320
 'International Tables Vol C Tables 4.2.6.8 and 6.1.1.4'
 'Si'  'Si'   0.2540   0.3300
 'International Tables Vol C Tables 4.2.6.8 and 6.1.1.4'
 
_symmetry_cell_setting            'Monoclinic'
_symmetry_space_group_name_H-M    'P 21/c'
_symmetry_space_group_name_Hall   '-p 2ybc'
 
loop_
 _symmetry_equiv_pos_as_xyz
 'x, y, z'
 '-x, y+1/2, -z+1/2'
 '-x, -y, -z'
 'x, -y-1/2, z-1/2'
 
_cell_length_a                    14.5059(3)
_cell_length_b                    6.17440(10)
_cell_length_c                    22.7859(4)
_cell_angle_alpha                 90.00
_cell_angle_beta                  92.000(2)
_cell_angle_gamma                 90.00
_cell_volume                      2039.58(6)
_cell_formula_units_Z             4
_cell_measurement_temperature     293(2)
_cell_measurement_reflns_used     3374
_cell_measurement_theta_min       3
_cell_measurement_theta_max       69
 
_exptl_crystal_description        Prism
_exptl_crystal_colour             Colourless
_exptl_crystal_size_max           0.18
_exptl_crystal_size_mid           0.13
_exptl_crystal_size_min           0.075
_exptl_crystal_density_meas       ?
_exptl_crystal_density_diffrn     1.096
_exptl_crystal_density_method     'not measured'
_exptl_crystal_F_000              728
_exptl_absorpt_correction_type       refdelf
_exptl_absorpt_coefficient_mu     1.034
_exptl_absorpt_process_details
;
Parkin S,Moezzi B & Hope H, (1995) J. Appl. Cryst. 28, 53-56
Cubic fit to sin(theta)/lambda - 24 parameters
;
_exptl_absorpt_correction_T_min      0.861
_exptl_absorpt_correction_T_max      0.934
_exptl_special_details
;
 ?
;
 
_diffrn_ambient_temperature       293(2)
_diffrn_radiation_wavelength      1.5418
_diffrn_radiation_type            CuK\a
_diffrn_radiation_source          'fine-focus sealed tube'
_diffrn_radiation_monochromator   'horizontally mounted graphite crystal'
_diffrn_measurement_device_type   'KappaCCD'
_diffrn_measurement_device        '95mm CCD camera on \k-goniostat'
_diffrn_detector_area_resol_mean    9
_diffrn_measurement_method        '\w scans'
_diffrn_standards_number          0 
_diffrn_standards_interval_count  ?
_diffrn_standards_interval_time   ?
_diffrn_standards_decay_%         ?
_diffrn_reflns_number             3374
_diffrn_reflns_av_R_equivalents   0.0000
_diffrn_reflns_av_sigmaI/netI     0.0603
_diffrn_reflns_limit_h_min        -17
_diffrn_reflns_limit_h_max        16
_diffrn_reflns_limit_k_min        0
_diffrn_reflns_limit_k_max        7
_diffrn_reflns_limit_l_min        0
_diffrn_reflns_limit_l_max        26
_diffrn_reflns_theta_min          3.88
_diffrn_reflns_theta_max          66.40
_reflns_number_total              3374
_reflns_number_gt                 1717
_reflns_threshold_expression      >2sigma(I)
 
_computing_data_collection        'Collect (Nonius BV, 1997-2000)'
_computing_cell_refinement        'HKL Scalepack (Otwinowski & Minor 1997)'
_computing_data_reduction        
 'HKL Denzo and Scalepack (Otwinowski & Minor 1997)'
_computing_structure_solution     'SHELXS-97 (Sheldrick, 1990)' 
_computing_structure_refinement   'SHELXL-97 (Sheldrick, 1997)' 
_computing_molecular_graphics     'PLATON (Spek, 2001)' 
_computing_publication_material   'SHELX-97 (Sheldrick, 1997)' 
 
_refine_special_details
;
 Refinement of F^2^ against ALL reflections.  The weighted R-factor wR and
 goodness of fit S are based on F^2^, conventional R-factors R are based
 on F, with F set to zero for negative F^2^. The threshold expression of
 F^2^ > 2sigma(F^2^) is used only for calculating R-factors(gt) etc. and is
 not relevant to the choice of reflections for refinement.  R-factors based
 on F^2^ are statistically about twice as large as those based on F, and R-
 factors based on ALL data will be even larger.
;
 
_refine_ls_structure_factor_coef  Fsqd
_refine_ls_matrix_type            full
_refine_ls_weighting_scheme       calc
_refine_ls_weighting_details
 'calc w=1/[\s^2^(Fo^2^)+(0.0402P)^2^+0.0000P] where P=(Fo^2^+2Fc^2^)/3'
_atom_sites_solution_primary      direct
_atom_sites_solution_secondary    difmap
_atom_sites_solution_hydrogens    geom
_refine_ls_hydrogen_treatment     mixed
_refine_ls_extinction_method      none
_refine_ls_extinction_coef        ?
_refine_ls_abs_structure_details
;
 Absolute Configuration of C2 = S
 Absolute Configuration of C3 = R
 Absolute Configuration of C4 = S
;
_refine_ls_number_reflns          3374
_refine_ls_number_parameters      269
_refine_ls_number_restraints      0
_refine_ls_R_factor_all           0.0702
_refine_ls_R_factor_gt            0.0345
_refine_ls_wR_factor_ref          0.0853
_refine_ls_wR_factor_gt           0.0728
_refine_ls_goodness_of_fit_ref    0.839
_refine_ls_restrained_S_all       0.839
_refine_ls_shift/su_max           0.000
_refine_ls_shift/su_mean          0.000
 
loop_
 _atom_site_label
 _atom_site_type_symbol
 _atom_site_fract_x
 _atom_site_fract_y
 _atom_site_fract_z
 _atom_site_U_iso_or_equiv
 _atom_site_adp_type
 _atom_site_occupancy
 _atom_site_symmetry_multiplicity
 _atom_site_calc_flag
 _atom_site_refinement_flags
 _atom_site_disorder_assembly
 _atom_site_disorder_group
Si1 Si 0.30409(4) 0.15320(9) 0.04721(3) 0.06394(18) Uani 1 1 d . . .
O1 O 0.20447(12) 0.5526(3) 0.20361(8) 0.1056(6) Uani 1 1 d . . .
C1 C 0.21600(15) 0.3580(4) 0.21148(9) 0.0760(6) Uani 1 1 d . . .
C2 C 0.28335(15) 0.2391(4) 0.17555(9) 0.0678(6) Uani 1 1 d . . .
C3 C 0.29979(15) 0.3261(4) 0.11402(9) 0.0648(5) Uani 1 1 d . . .
C4 C 0.37181(14) 0.3534(4) 0.16245(9) 0.0655(5) Uani 1 1 d . . .
C5 C 0.46277(14) 0.2418(3) 0.16238(8) 0.0647(5) Uani 1 1 d . . .
C6 C 0.53496(17) 0.3409(5) 0.13395(11) 0.0839(7) Uani 1 1 d . . .
C7 C 0.6205(2) 0.2485(6) 0.13261(13) 0.1044(9) Uani 1 1 d . . .
C8 C 0.6368(2) 0.0528(6) 0.15957(12) 0.1008(9) Uani 1 1 d . . .
C9 C 0.5681(2) -0.0453(5) 0.18850(11) 0.0879(8) Uani 1 1 d . . .
C10 C 0.48139(17) 0.0472(4) 0.19029(10) 0.0755(6) Uani 1 1 d . . .
C11 C 0.36525(17) 0.3041(4) -0.00994(10) 0.0966(8) Uani 1 1 d . . .
H11A H 0.3307 0.4315 -0.0207 0.145 Uiso 1 1 calc R . .
H11B H 0.3714 0.2137 -0.0438 0.145 Uiso 1 1 calc R . .
H11C H 0.4253 0.3455 0.0051 0.145 Uiso 1 1 calc R . .
C12 C 0.36557(18) -0.1067(3) 0.06142(11) 0.0965(8) Uani 1 1 d . . .
H12A H 0.3645 -0.1919 0.0262 0.145 Uiso 1 1 calc R . .
H12B H 0.3356 -0.1849 0.0918 0.145 Uiso 1 1 calc R . .
H12C H 0.4283 -0.0776 0.0737 0.145 Uiso 1 1 calc R . .
C13 C 0.17731(18) -0.0328(5) -0.03481(11) 0.1091(9) Uani 1 1 d . . .
H13A H 0.1140 -0.0576 -0.0467 0.164 Uiso 1 1 calc R . .
H13B H 0.2077 -0.1693 -0.0282 0.164 Uiso 1 1 calc R . .
H13C H 0.2075 0.0451 -0.0651 0.164 Uiso 1 1 calc R . .
C14 C 0.13167(18) -0.0283(5) 0.06956(12) 0.1240(11) Uani 1 1 d . . .
H14A H 0.1246 0.0612 0.1036 0.186 Uiso 1 1 calc R . .
H14B H 0.1673 -0.1542 0.0802 0.186 Uiso 1 1 calc R . .
H14C H 0.0720 -0.0722 0.0544 0.186 Uiso 1 1 calc R . .
C15 C 0.12871(19) 0.3122(5) 0.01103(14) 0.1268(11) Uani 1 1 d . . .
H15A H 0.1583 0.3941 -0.0188 0.190 Uiso 1 1 calc R . .
H15B H 0.1282 0.3953 0.0466 0.190 Uiso 1 1 calc R . .
H15C H 0.0665 0.2798 -0.0018 0.190 Uiso 1 1 calc R . .
C16 C 0.18163(15) 0.1006(4) 0.02222(9) 0.0767(6) Uani 1 1 d . . .
C17 C 0.16369(15) 0.2424(4) 0.25688(9) 0.0746(6) Uani 1 1 d . . .
C18 C 0.18640(19) 0.0396(5) 0.27714(11) 0.0917(8) Uani 1 1 d . . .
C19 C 0.1368(2) -0.0575(7) 0.32088(14) 0.1141(9) Uani 1 1 d . . .
C20 C 0.0639(3) 0.0455(9) 0.34375(15) 0.1257(12) Uani 1 1 d . . .
C21 C 0.0392(2) 0.2452(9) 0.32326(16) 0.1303(13) Uani 1 1 d . . .
C22 C 0.08840(18) 0.3452(6) 0.28038(12) 0.1010(8) Uani 1 1 d . . .
H2 H 0.2845(12) 0.088(3) 0.1809(8) 0.065(6) Uiso 1 1 d . . .
H3 H 0.2643(13) 0.447(3) 0.1082(9) 0.077(7) Uiso 1 1 d . . .
H4 H 0.3746(12) 0.499(3) 0.1798(8) 0.071(6) Uiso 1 1 d . . .
H6 H 0.5221(16) 0.473(4) 0.1167(11) 0.107(9) Uiso 1 1 d . . .
H7 H 0.6722(18) 0.312(4) 0.1110(11) 0.123(9) Uiso 1 1 d . . .
H8 H 0.6958(18) 0.001(4) 0.1609(11) 0.111(9) Uiso 1 1 d . . .
H9 H 0.5756(14) -0.174(3) 0.2046(9) 0.076(7) Uiso 1 1 d . . .
H10 H 0.4311(14) -0.033(3) 0.2102(9) 0.084(7) Uiso 1 1 d . . .
H18 H 0.2398(16) -0.039(4) 0.2611(10) 0.103(8) Uiso 1 1 d . . .
H19 H 0.1593(18) -0.201(4) 0.3358(12) 0.115(10) Uiso 1 1 d . . .
H20 H 0.030(2) -0.015(5) 0.3769(14) 0.142(11) Uiso 1 1 d . . .
H21 H -0.015(2) 0.320(5) 0.3351(14) 0.155(12) Uiso 1 1 d . . .
H22 H 0.0788(18) 0.493(4) 0.2675(11) 0.115(11) Uiso 1 1 d . . .
 
loop_
 _atom_site_aniso_label
 _atom_site_aniso_U_11
 _atom_site_aniso_U_22
 _atom_site_aniso_U_33
 _atom_site_aniso_U_23
 _atom_site_aniso_U_13
 _atom_site_aniso_U_12
Si1 0.0729(4) 0.0592(3) 0.0600(3) -0.0009(3) 0.0075(3) -0.0041(3)
O1 0.1319(15) 0.0785(11) 0.1081(14) -0.0062(10) 0.0287(11) 0.0271(10)
C1 0.0820(15) 0.0772(15) 0.0689(14) -0.0105(13) 0.0023(12) 0.0144(13)
C2 0.0797(15) 0.0614(13) 0.0631(13) -0.0011(11) 0.0131(11) 0.0055(11)
C3 0.0740(14) 0.0604(13) 0.0599(12) 0.0028(10) 0.0035(11) 0.0040(11)
C4 0.0759(14) 0.0612(12) 0.0595(12) -0.0030(11) 0.0017(11) 0.0005(12)
C5 0.0701(14) 0.0735(13) 0.0502(11) -0.0032(10) -0.0018(11) -0.0019(11)
C6 0.0817(18) 0.0917(18) 0.0783(16) 0.0140(15) 0.0022(14) -0.0007(15)
C7 0.0771(19) 0.145(3) 0.0911(19) 0.0323(19) 0.0090(16) 0.0015(18)
C8 0.078(2) 0.154(3) 0.0705(17) 0.0121(17) 0.0028(16) 0.0241(19)
C9 0.104(2) 0.095(2) 0.0641(15) 0.0137(14) -0.0032(15) 0.0256(16)
C10 0.0824(17) 0.0811(15) 0.0632(13) 0.0097(12) 0.0047(13) 0.0061(13)
C11 0.115(2) 0.099(2) 0.0771(15) -0.0099(14) 0.0271(14) -0.0269(15)
C12 0.1101(19) 0.0714(17) 0.1069(19) -0.0174(13) -0.0120(16) 0.0093(13)
C13 0.099(2) 0.133(2) 0.095(2) -0.0340(17) -0.0040(16) -0.0192(16)
C14 0.0936(19) 0.170(3) 0.110(2) 0.001(2) 0.0147(17) -0.0523(18)
C15 0.102(2) 0.129(3) 0.146(3) -0.019(2) -0.039(2) 0.0218(18)
C16 0.0774(15) 0.0831(17) 0.0695(14) -0.0071(11) 0.0007(12) -0.0022(11)
C17 0.0674(14) 0.1003(17) 0.0563(12) -0.0147(12) 0.0057(11) 0.0055(12)
C18 0.0895(19) 0.105(2) 0.0822(17) 0.0034(16) 0.0243(16) 0.0042(16)
C19 0.115(2) 0.135(3) 0.095(2) 0.017(2) 0.0315(19) -0.007(2)
C20 0.106(3) 0.193(4) 0.080(2) -0.011(2) 0.028(2) -0.028(3)
C21 0.091(2) 0.205(4) 0.096(2) -0.027(3) 0.028(2) 0.021(3)
C22 0.0943(19) 0.131(3) 0.0791(17) -0.0185(19) 0.0154(15) 0.0204(19)
 
_geom_special_details
;
 All esds (except the esd in the dihedral angle between two l.s. planes)
 are estimated using the full covariance matrix.  The cell esds are taken
 into account individually in the estimation of esds in distances, angles
 and torsion angles; correlations between esds in cell parameters are only
 used when they are defined by crystal symmetry.  An approximate (isotropic)
 treatment of cell esds is used for estimating esds involving l.s. planes.
;
 
loop_
 _geom_bond_atom_site_label_1
 _geom_bond_atom_site_label_2
 _geom_bond_distance
 _geom_bond_site_symmetry_2
 _geom_bond_publ_flag
Si1 C11 1.853(2) . ?
Si1 C12 1.859(2) . ?
Si1 C3 1.862(2) . ?
Si1 C16 1.875(2) . ?
O1 C1 1.226(2) . ?
C1 C17 1.487(3) . ?
C1 C2 1.490(3) . ?
C2 C4 1.503(3) . ?
C2 C3 1.528(3) . ?
C2 H2 0.940(19) . ?
C3 C4 1.502(3) . ?
C3 H3 0.92(2) . ?
C4 C5 1.488(3) . ?
C4 H4 0.980(19) . ?
C5 C10 1.382(3) . ?
C5 C6 1.392(3) . ?
C6 C7 1.367(3) . ?
C6 H6 0.92(2) . ?
C7 C8 1.372(4) . ?
C7 H7 0.99(3) . ?
C8 C9 1.357(4) . ?
C8 H8 0.91(3) . ?
C9 C10 1.383(3) . ?
C9 H9 0.88(2) . ?
C10 H10 1.00(2) . ?
C11 H11A 0.9600 . ?
C11 H11B 0.9600 . ?
C11 H11C 0.9600 . ?
C12 H12A 0.9600 . ?
C12 H12B 0.9600 . ?
C12 H12C 0.9600 . ?
C13 C16 1.538(3) . ?
C13 H13A 0.9600 . ?
C13 H13B 0.9600 . ?
C13 H13C 0.9600 . ?
C14 C16 1.542(3) . ?
C14 H14A 0.9600 . ?
C14 H14B 0.9600 . ?
C14 H14C 0.9600 . ?
C15 C16 1.532(3) . ?
C15 H15A 0.9600 . ?
C15 H15B 0.9600 . ?
C15 H15C 0.9600 . ?
C17 C18 1.371(3) . ?
C17 C22 1.387(3) . ?
C18 C19 1.386(4) . ?
C18 H18 0.99(2) . ?
C19 C20 1.355(5) . ?
C19 H19 1.00(3) . ?
C20 C21 1.362(5) . ?
C20 H20 0.99(3) . ?
C21 C22 1.376(5) . ?
C21 H21 0.96(3) . ?
C22 H22 0.97(2) . ?
 
loop_
 _geom_angle_atom_site_label_1
 _geom_angle_atom_site_label_2
 _geom_angle_atom_site_label_3
 _geom_angle
 _geom_angle_site_symmetry_1
 _geom_angle_site_symmetry_3
 _geom_angle_publ_flag
C11 Si1 C12 108.55(12) . . ?
C11 Si1 C3 108.47(10) . . ?
C12 Si1 C3 112.46(11) . . ?
C11 Si1 C16 110.22(11) . . ?
C12 Si1 C16 110.31(11) . . ?
C3 Si1 C16 106.82(10) . . ?
O1 C1 C17 120.1(2) . . ?
O1 C1 C2 119.4(2) . . ?
C17 C1 C2 120.4(2) . . ?
C1 C2 C4 117.3(2) . . ?
C1 C2 C3 117.2(2) . . ?
C4 C2 C3 59.41(14) . . ?
C1 C2 H2 115.2(12) . . ?
C4 C2 H2 118.7(11) . . ?
C3 C2 H2 117.7(12) . . ?
C4 C3 C2 59.48(14) . . ?
C4 C3 Si1 128.51(16) . . ?
C2 C3 Si1 124.02(16) . . ?
C4 C3 H3 112.9(13) . . ?
C2 C3 H3 108.4(13) . . ?
Si1 C3 H3 112.6(13) . . ?
C5 C4 C3 122.75(18) . . ?
C5 C4 C2 123.08(19) . . ?
C3 C4 C2 61.11(13) . . ?
C5 C4 H4 113.6(11) . . ?
C3 C4 H4 114.6(11) . . ?
C2 C4 H4 111.9(11) . . ?
C10 C5 C6 117.3(2) . . ?
C10 C5 C4 124.1(2) . . ?
C6 C5 C4 118.6(2) . . ?
C7 C6 C5 121.7(3) . . ?
C7 C6 H6 122.0(15) . . ?
C5 C6 H6 116.3(15) . . ?
C6 C7 C8 120.0(3) . . ?
C6 C7 H7 123.2(15) . . ?
C8 C7 H7 116.8(15) . . ?
C9 C8 C7 119.5(3) . . ?
C9 C8 H8 122.0(16) . . ?
C7 C8 H8 118.1(16) . . ?
C8 C9 C10 121.0(3) . . ?
C8 C9 H9 121.5(14) . . ?
C10 C9 H9 117.3(14) . . ?
C5 C10 C9 120.6(2) . . ?
C5 C10 H10 120.4(12) . . ?
C9 C10 H10 119.0(12) . . ?
Si1 C11 H11A 109.5 . . ?
Si1 C11 H11B 109.5 . . ?
H11A C11 H11B 109.5 . . ?
Si1 C11 H11C 109.5 . . ?
H11A C11 H11C 109.5 . . ?
H11B C11 H11C 109.5 . . ?
Si1 C12 H12A 109.5 . . ?
Si1 C12 H12B 109.5 . . ?
H12A C12 H12B 109.5 . . ?
Si1 C12 H12C 109.5 . . ?
H12A C12 H12C 109.5 . . ?
H12B C12 H12C 109.5 . . ?
C16 C13 H13A 109.5 . . ?
C16 C13 H13B 109.5 . . ?
H13A C13 H13B 109.5 . . ?
C16 C13 H13C 109.5 . . ?
H13A C13 H13C 109.5 . . ?
H13B C13 H13C 109.5 . . ?
C16 C14 H14A 109.5 . . ?
C16 C14 H14B 109.5 . . ?
H14A C14 H14B 109.5 . . ?
C16 C14 H14C 109.5 . . ?
H14A C14 H14C 109.5 . . ?
H14B C14 H14C 109.5 . . ?
C16 C15 H15A 109.5 . . ?
C16 C15 H15B 109.5 . . ?
H15A C15 H15B 109.5 . . ?
C16 C15 H15C 109.5 . . ?
H15A C15 H15C 109.5 . . ?
H15B C15 H15C 109.5 . . ?
C15 C16 C13 108.1(2) . . ?
C15 C16 C14 108.2(2) . . ?
C13 C16 C14 108.0(2) . . ?
C15 C16 Si1 111.50(17) . . ?
C13 C16 Si1 111.08(16) . . ?
C14 C16 Si1 109.90(16) . . ?
C18 C17 C22 118.1(3) . . ?
C18 C17 C1 123.4(2) . . ?
C22 C17 C1 118.5(3) . . ?
C17 C18 C19 120.9(3) . . ?
C17 C18 H18 120.1(14) . . ?
C19 C18 H18 119.0(14) . . ?
C20 C19 C18 120.4(4) . . ?
C20 C19 H19 122.4(16) . . ?
C18 C19 H19 117.1(16) . . ?
C19 C20 C21 119.5(4) . . ?
C19 C20 H20 122.4(18) . . ?
C21 C20 H20 118.0(18) . . ?
C20 C21 C22 120.9(3) . . ?
C20 C21 H21 123(2) . . ?
C22 C21 H21 116(2) . . ?
C21 C22 C17 120.2(4) . . ?
C21 C22 H22 124.5(16) . . ?
C17 C22 H22 114.9(17) . . ?
 
_diffrn_measured_fraction_theta_max    0.937
_diffrn_reflns_theta_full              66.40
_diffrn_measured_fraction_theta_full   0.937
_refine_diff_density_max    0.112
_refine_diff_density_min   -0.175
_refine_diff_density_rms    0.028

#===============================================================================
data_global
#===============================================================================

# 1. SUBMISSION DETAILS

_publ_contact_author # Name and address of author for correspondence

;     Santiago Garc\'ia-Granda
      Departamento de Qu\'imica F\'isica y Anal\'itica
      Facultad de Qu\'imica
      Universidad de Oviedo
      Avda. Juli\'an Claver\'ia, 8
      33071 Oviedo
      Spain
; 

_publ_contact_author_phone     
   '0034 98 5103477'
_publ_contact_author_fax          '0034 98 5103125'
_publ_contact_author_email        sgg@uniovi.es

_publ_requested_journal           'test'
_publ_requested_coeditor_name     ''
_publ_contact_letter
;
Oviedo 09/10/2007

Please receive the CIF file for compound 7a.


     Thank you very much.

     S. Garc\'ia-Granda.
;
             
#==============================================================================

# 2. PROCESSING SUMMARY (IUCr Office Use Only)

_journal                          ?
_date_recd_electronic             ?

_journal_date_to_coeditor         ?
_journal_date_from_coeditor       ?
_journal_date_accepted            ?

_journal_date_printers_first      ?
_journal_date_printers_final      ?
_journal_date_proofs_out          ?
_journal_date_proofs_in           ?

_journal_coeditor_name            ?
_journal_coeditor_code            ?
_journal_coeditor_notes           ?

_journal_techeditor_code          ?
_journal_techeditor_notes         ?

_journal_coden_ASTM               ?
_journal_name_full                ? 
_journal_year                     ?
_journal_volume                   ?
_journal_issue                    ?
_journal_page_first               ?
_journal_page_last                ?

_journal_suppl_publ_number        ?
_journal_suppl_publ_pages         ?

#==============================================================================

# 3. TITLE AND AUTHOR LIST

_publ_section_title
;
Crystal structure of compound 7a
;

# The loop structure below should contain the names and addresses of all
# authors, in the required order of publication. Repeat as necessary.

loop_
       _publ_author_name
       _publ_author_address
 

      'Santiago Garc\'ia-Granda'
;      Departamento de Qu\'imica F\'isica y Anal\'itica
       Universidad de Oviedo
       33006-Oviedo
       Spain
;

       'Mar\'ia Rosario D\'iaz'
;      Departamento de Qu\'imica F\'isica y Anal\'itica
       Universidad de Oviedo
       33006-Oviedo
       Spain
;

       'Humberto Rodr\'iguez-Solla'
;      Departamento de Qu\'imica Org\'anica e Inorg\'anica.
       Universidad de Oviedo
       33006-Oviedo
       Spain
;
       'Carmen M\'ejica'
;      Departamento de Qu\'imica Org\'anica e Inorg\'anica.
       Universidad de Oviedo
       33006-Oviedo
       Spain
;
       'Elena Blanco'
;      Departamento de Qu\'imica Org\'anica e Inorg\'anica.
       Universidad de Oviedo
       33006-Oviedo
       Spain
;
      'Jos\'e Manuel Concell\'on'
;      Departamento de Qu\'imica Org\'anica e Inorg\'anica.
       Universidad de Oviedo
       33006-Oviedo
       Spain
;


#==========================================================================

# 4. TEXT


_publ_section_exptl_prep
;
Data collection was performed on a Nonius KappaCCD 
single crystal diffractometer.
Crystal-detector distance
was fixed at 29 mm.
;
_publ_section_exptl_refinement
;
Crystal structure was solved by direct methods.
All non-hydrogen atoms were anisotropically refined.
Hydrogen atoms were located in a difference Fourier map.
All calculations were made at the University of Oviedo on the X-Ray group
computers.
;

_publ_section_references
;
Nonius BV, (1997-2000). COLLECT.

Otwinowski, Z. & Minor, W. (1997). Methods Enzymol. 276, 307-326.

Sheldrick, G. M. (1990). Acta Cryst. A46, 467-473.

Sheldrick, G. M. (1997). SHELXL-97. University of Gottingen. A computer
program for refinement of crystal structures.

Spek, A. L. (2001). PLATON. A Multipurpose Crystallographic Tool, Utrecht
University, Utrecht, The Netherlands.
;
